# Supplementary material for: Assessing the Potential for Genome-Assisted Breeding in Red Perilla Using Quantitative Trait Locus Analysis and Genomic Prediction
Source: MDPI journal article supplement (doi:10.3390/genes14122137), 2023-11-27
Supplement: s1 [file s1]

**Table S1.** Phenotype data of four cross-parents collected in 2022.

| Parents  | PA<br>(mg/g DW) | RA<br>(mg/g DW) | ANT   | YI<br>(g DW) | FD  |
|----------|-----------------|-----------------|-------|--------------|-----|
| SekihoS8 | 5.37            | 23.87           | Red   | 46.47        | 140 |
| st27     | 6.36            | 17.64           | Green | 81.13        | 130 |
| st40     | 0.34            | 18.51           | Green | 83.67        | 144 |
| st44     | 4.74            | 25.12           | Green | 90.93        | 146 |

PA, perillaldehyde; RA, rosmarinic acid; ANT, anthocyanin; YI, yield; FD, flowering date.

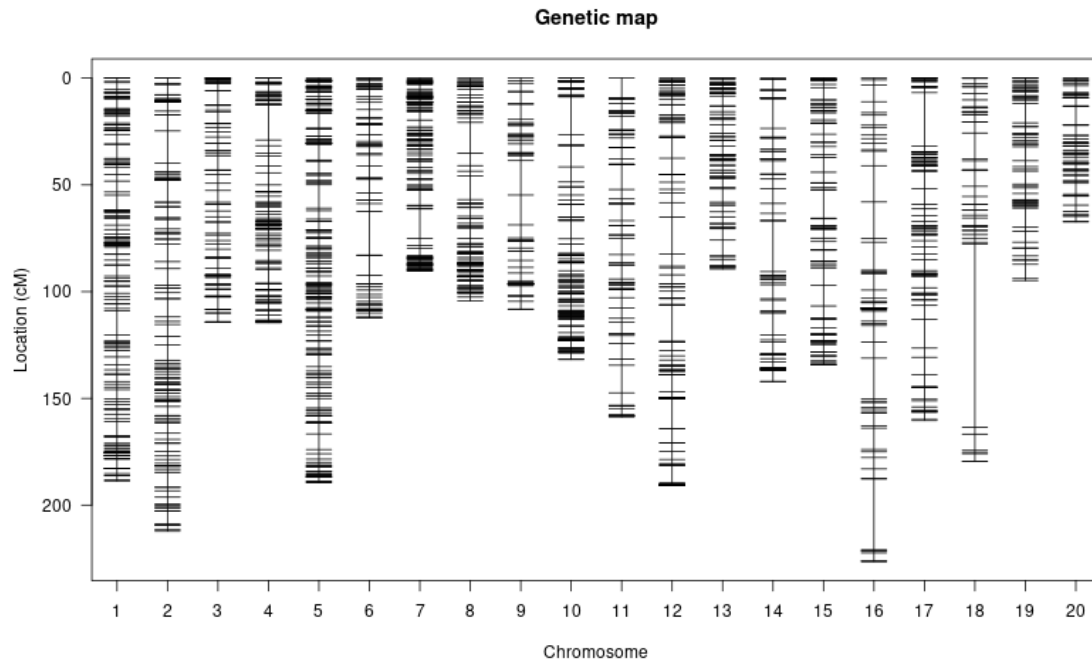

**Figure S1.** Common genetic maps constructed using 20 chromosomes defined from three populations.

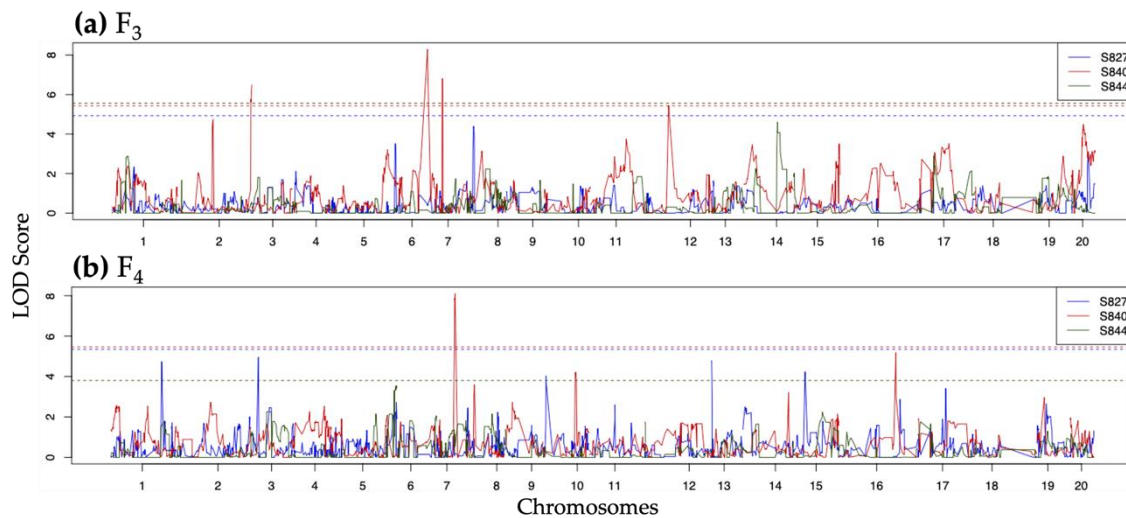

**Figure S2.** QTLs detected for rosmarinic acid in S827 (blue), S840 (red), and S844 (green). **(a)** QTLs detected in the F<sub>3</sub> population; **(b)** QTLs detected in the F<sub>4</sub> population. Dashed lines represent the LOD threshold estimated by 10,000 permutations for each population.

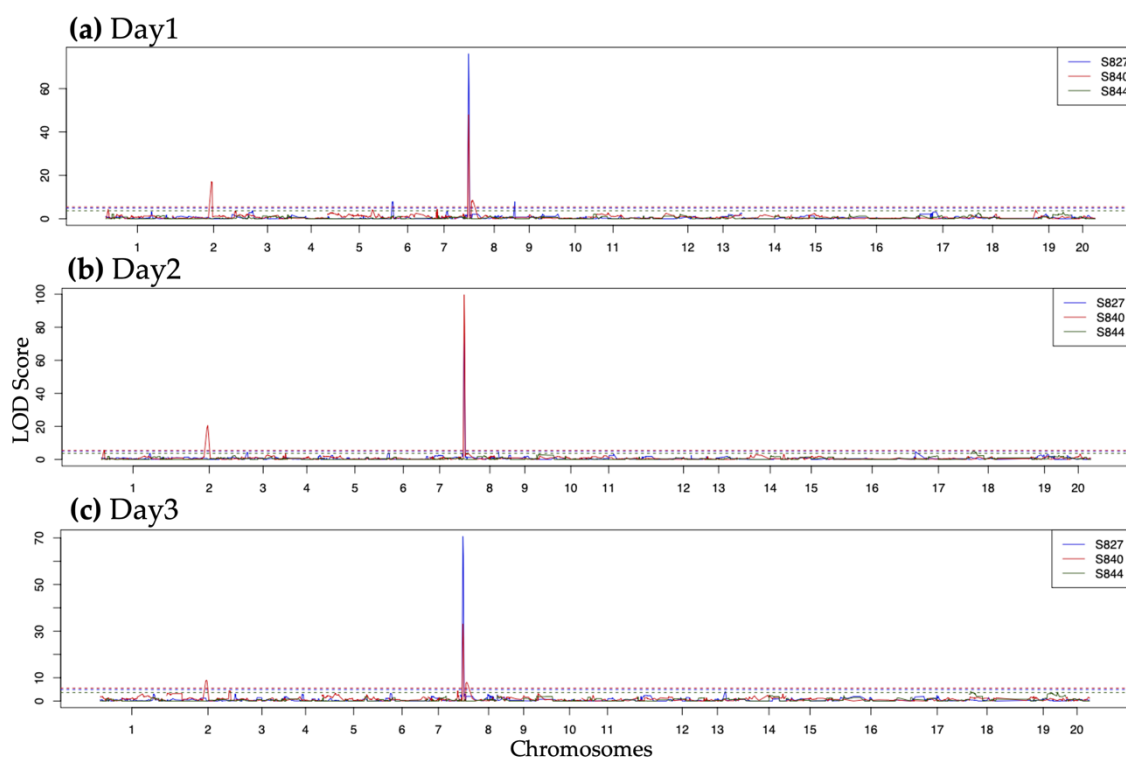

**Figure S3.** QTLs detected for anthocyanin in S827 (blue), S840 (red), and S844 (green). **(a)** QTLs detected in the 1<sup>st</sup> measurement of anthocyanin; **(b)** QTLs detected in the 2<sup>nd</sup> measurement of anthocyanin; **(c)** QTLs detected in the 3<sup>rd</sup> measurement of anthocyanin. Dashed lines represent the LOD threshold estimated by 10,000 permutations for each population.

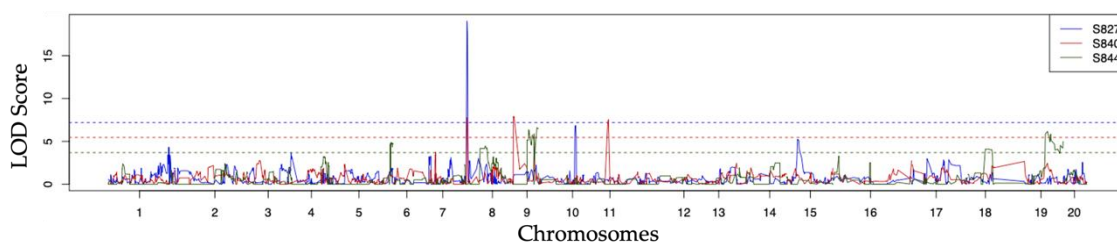

**Figure S4.** QTLs detected for yield in S827 (blue), S840 (red), and S844 (green). Dashed lines represent the LOD threshold estimated by 10,000 permutations for each population.

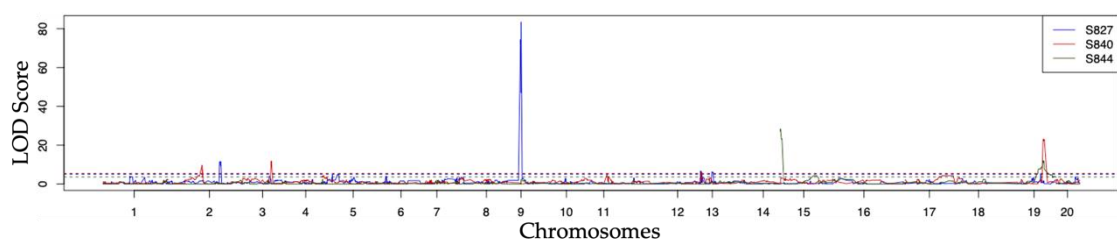

**Figure S5.** QTLs detected for flowering date in S827 (blue), S840 (red), and S844 (green). Dashed lines represent the LOD threshold estimated by 10,000 permutations for each population.

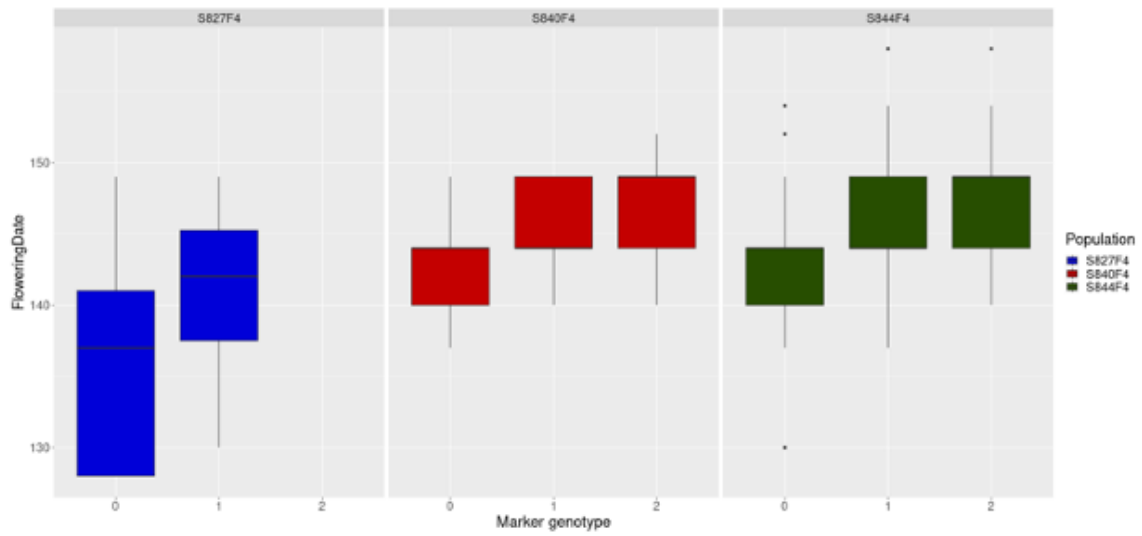

**Figure S6.** Genotypes of QTL detected on chr19 for flowering date. Genotype scores 0, 1, and 2 represent homozygous for ‘SekihoS8’, heterozygous, and homozygous for the other cross parents, respectively. Blue: S827; Red: S840; Green: S844.

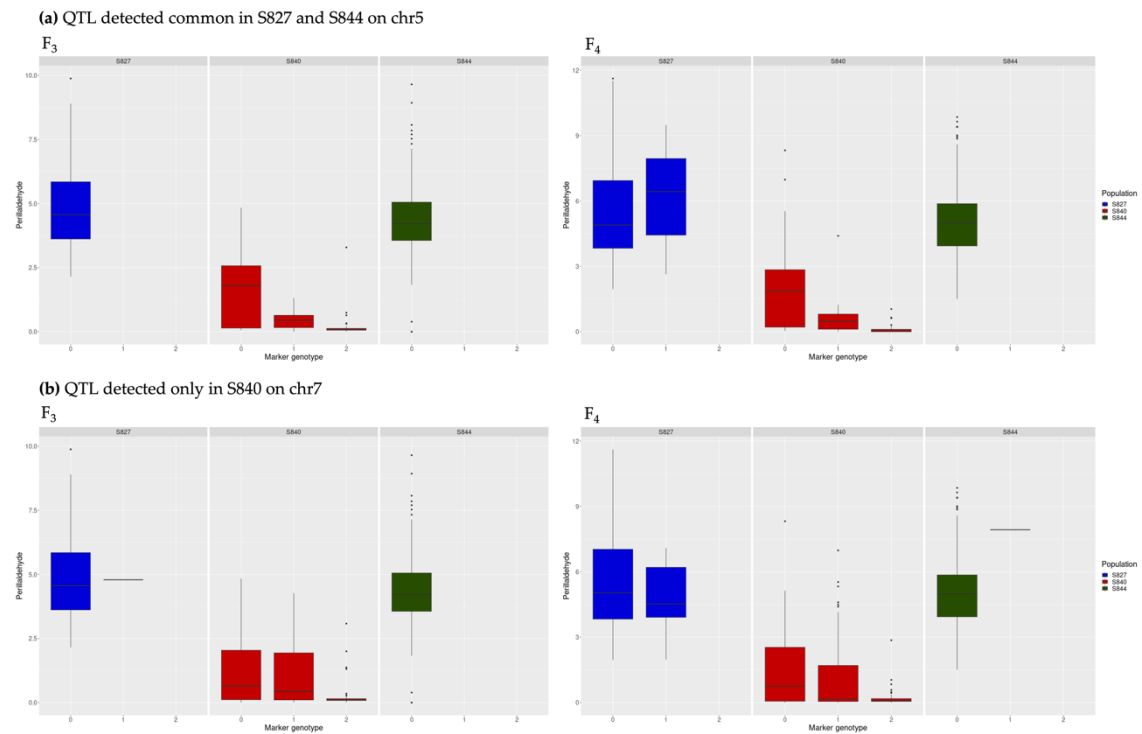

**Figure S7.** Genotypes of QTLs detected for perillaldehyde. Genotype scores 0, 1, and 2 represent homozygous for ‘SekihoS8’, heterozygous, and homozygous for the other cross parents, respectively. The panel on the left side is for F<sub>3</sub> generation and the panel on the right side is for F<sub>4</sub> generation. Blue: S827; Red: S840; Green: S844. (a) The genotypes at the QTL detected in both S827 and S844 on chr5; (b) The genotypes at the QTL detected only in S840 on chr7.

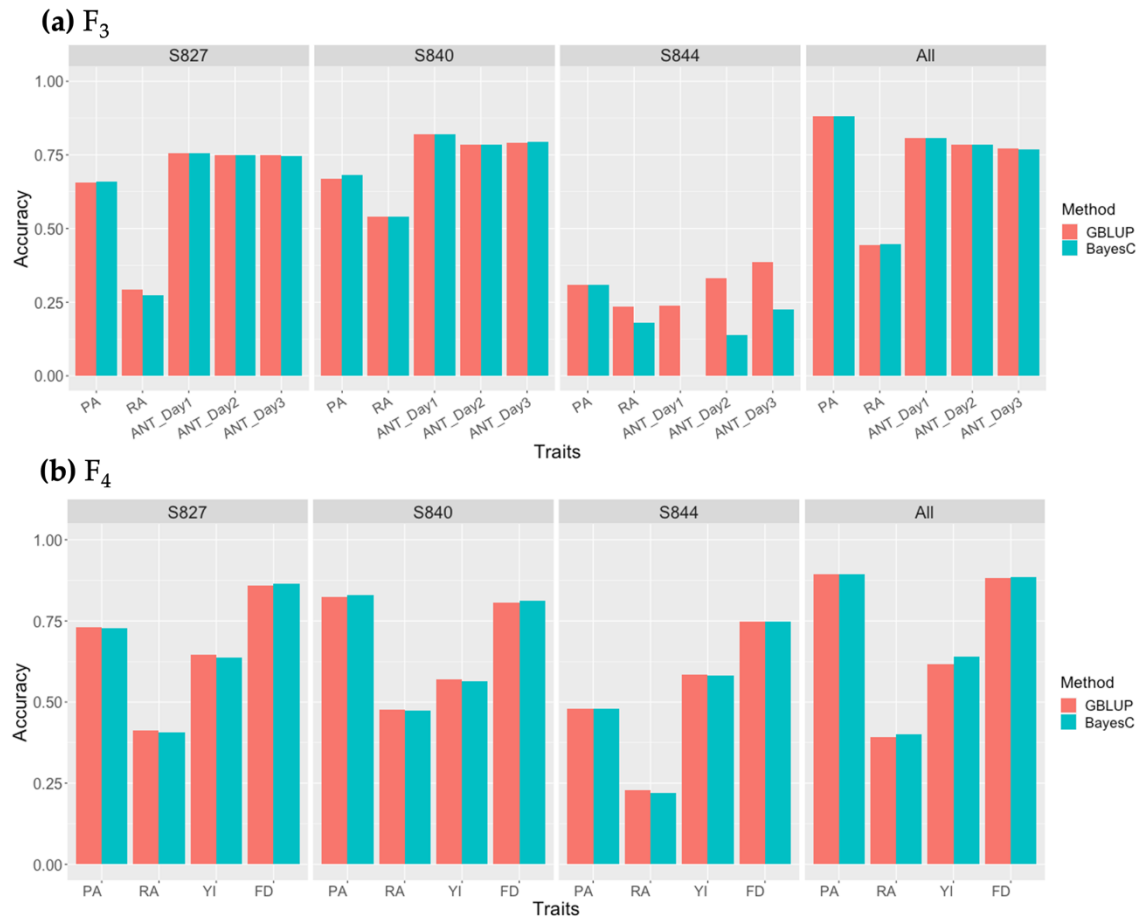

**Figure S8.** Prediction accuracy of multi-trait GP by the GBLUP (red) and BayesC $\pi$  (cyan) models using each population and the three populations combined. **(a)** Prediction accuracy using the F<sub>3</sub> population; **(b)** Prediction accuracy using the F<sub>4</sub> population. PA: perillaldehyde, RA: rosmarinic acid, ANT\_Dayn: n<sup>th</sup> measurement of anthocyanin, YI: yield, FD: flowering date.
